# Supplementary material for: High energy density of polymer nanocomposites at a low electric field induced by modulation of their topological-structure
Source: Royal Society of Chemistry journal article supplement (doi:10.1039/c6ta02186g), 2016-01-01
Supplement: c6ta02186g1.pdf [file c6ta02186g1.pdf]

## Supporting Information

### High Energy Density of Polymer Nanocomposites at Low Electric Field induced by Modulation of Topological-Structure

Yang Shen<sup>\*1</sup>, Dashan Shen<sup>1</sup>, Xin Zhang<sup>1</sup>, Jianyong Jiang<sup>1</sup>, Zhenkan Dan<sup>1</sup>, Yu Song<sup>2</sup>, Yuanhua Lin<sup>1</sup>, Ming Li<sup>1</sup>, and Ce-Wen Nan<sup>1</sup>

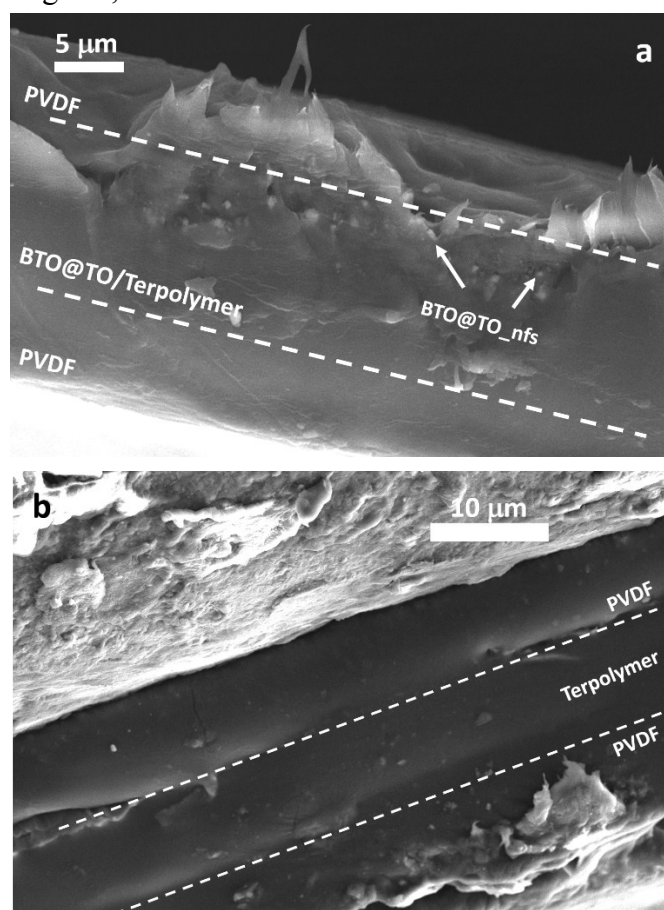

Figure S1 Cross-sectional SEM images for (a) TSM-02 and (b) TSM-03 nanocomposites.

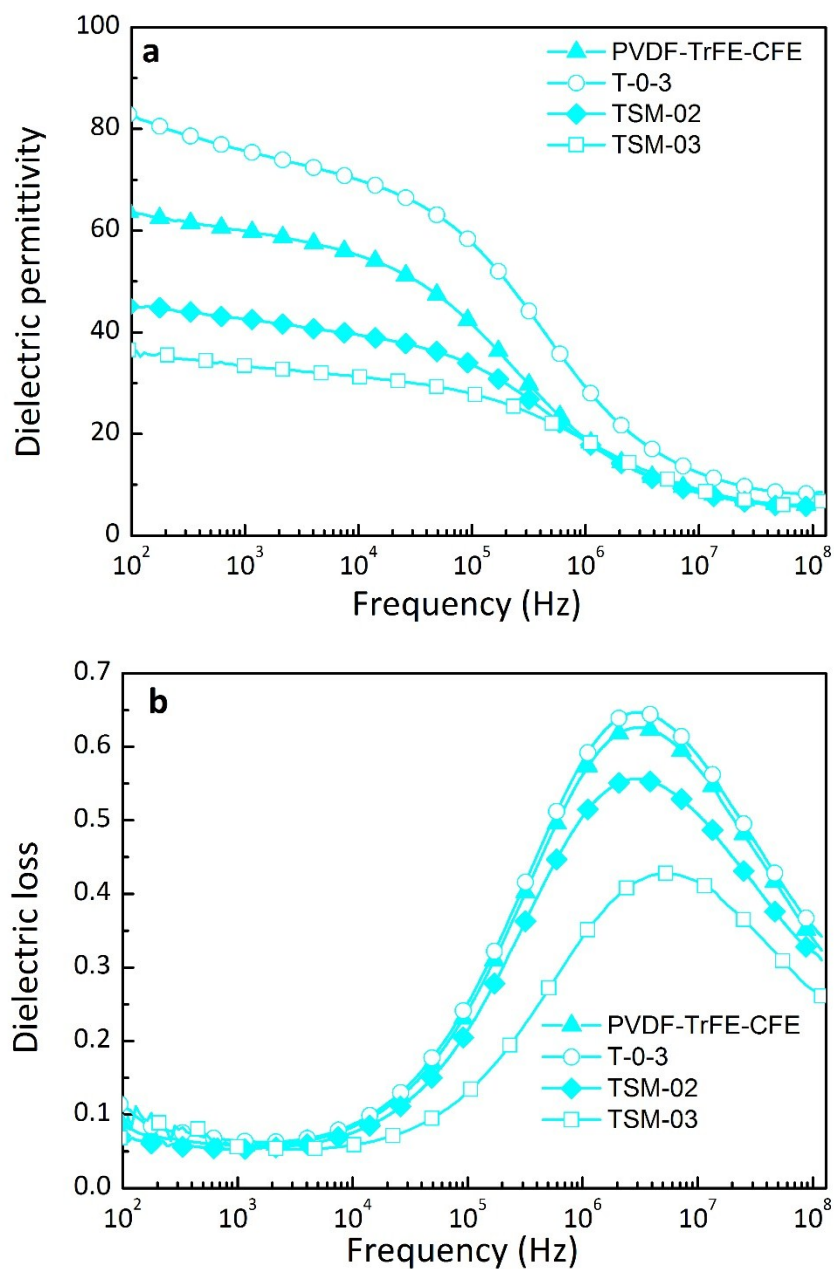

**Figure S2** The frequency dependences of dielectric permittivity (a) and dielectric loss (b) for the topological-structure modulated nanocomposites.

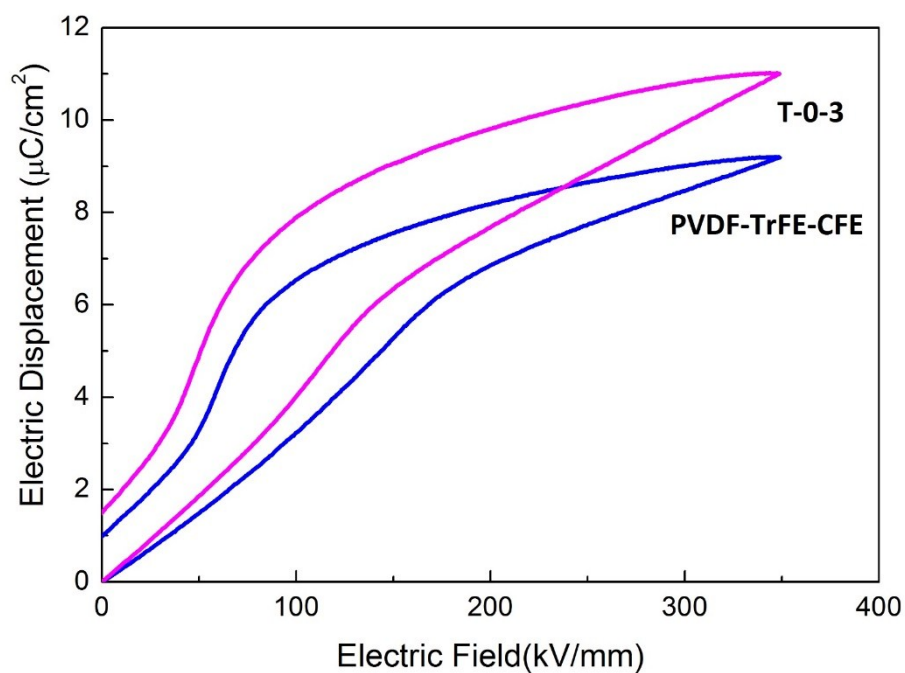

**Figure S3** The electric polarization-electric field ( $P$ - $E$ ) loops for pure PVDF-TrFE-CFE and T-0-3 nanocomposites.

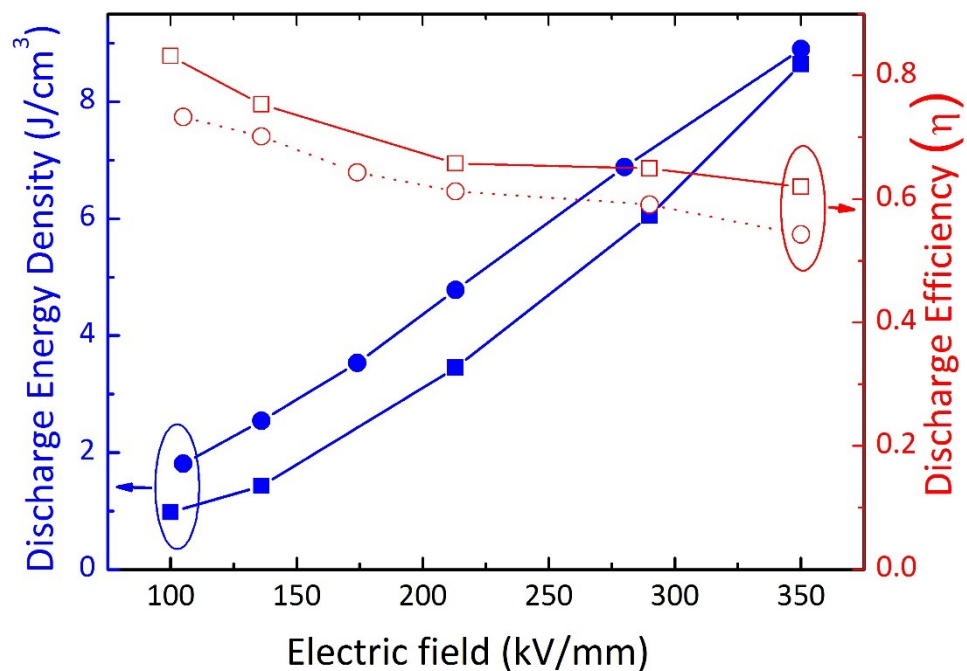

**Figure S4** Variations of discharge energy density (solid in blue) and efficiency (open in red) with electric field for TSM-03 (circles) and T-0-3 nanocomposites (squares).

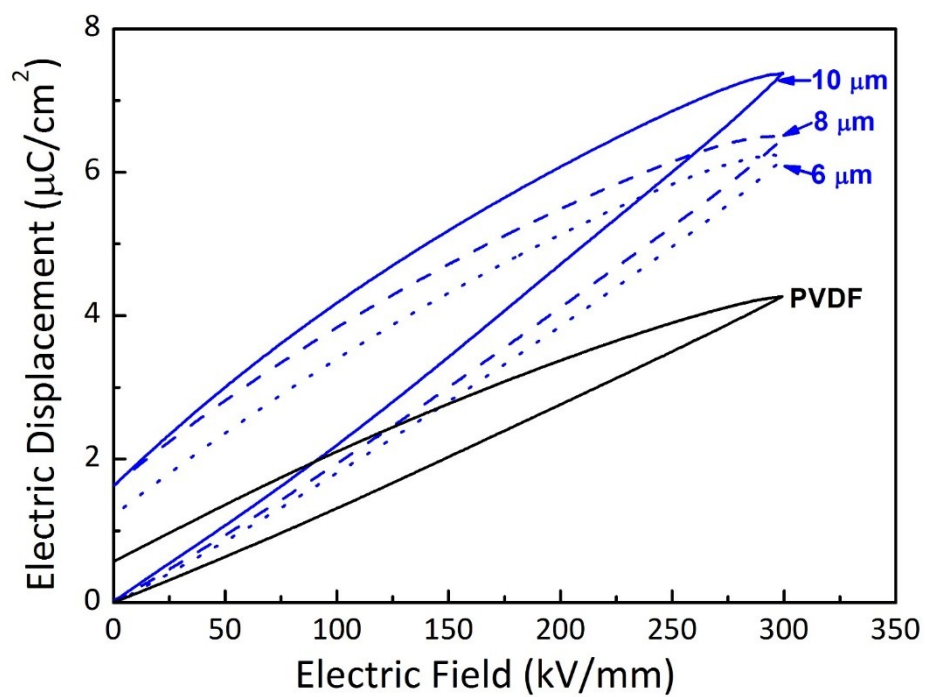

**Figure S5** The electric polarization-electric field ( $P$ - $E$ ) loops for pure PVDF and TSM-01 nanocomposites with B-layers of different thickness.
